# Supplementary material for: A new one-dimensional Mn(ii) complex containing two enantiomeric subunits with mixed carboxylate, pyridine and sulfinate bridges
Source: Royal Society of Chemistry journal article supplement (doi:10.1039/b701346a), 2007-01-01
Supplement: b701346a.pdf [file b701346a.pdf]

## Electronic supplementary information

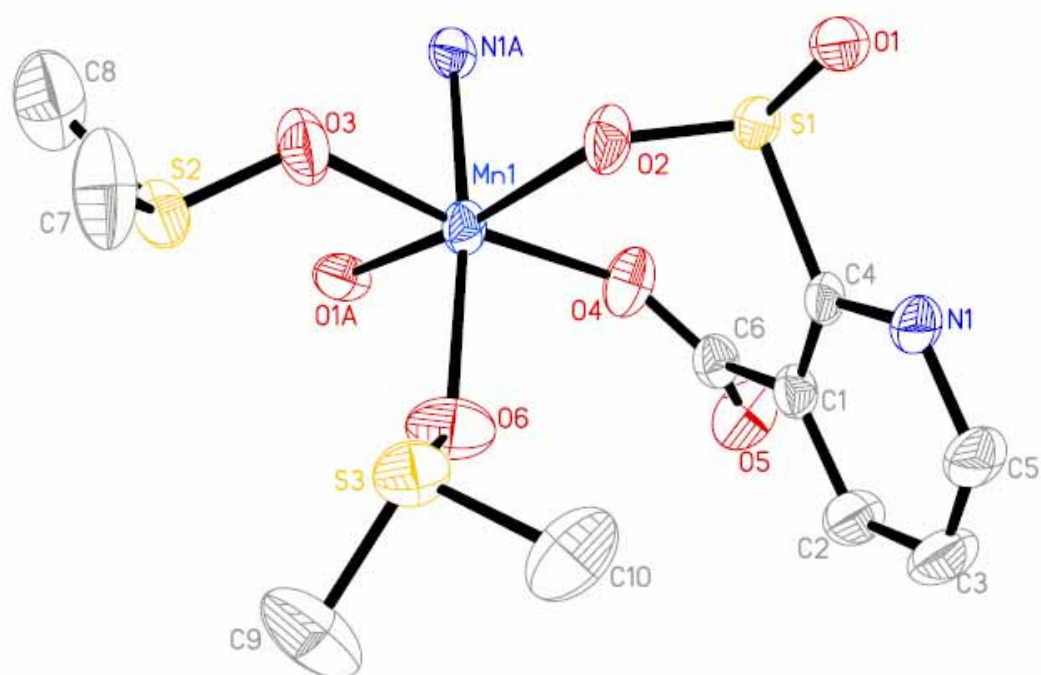

**Fig. S1** Thermal ellipsoid plot showing atom labeling scheme in **1**. Thermal ellipsoids drawn at the 50% probability level. Symmetry codes: A ( $x+1/2, y/2, z$ ).

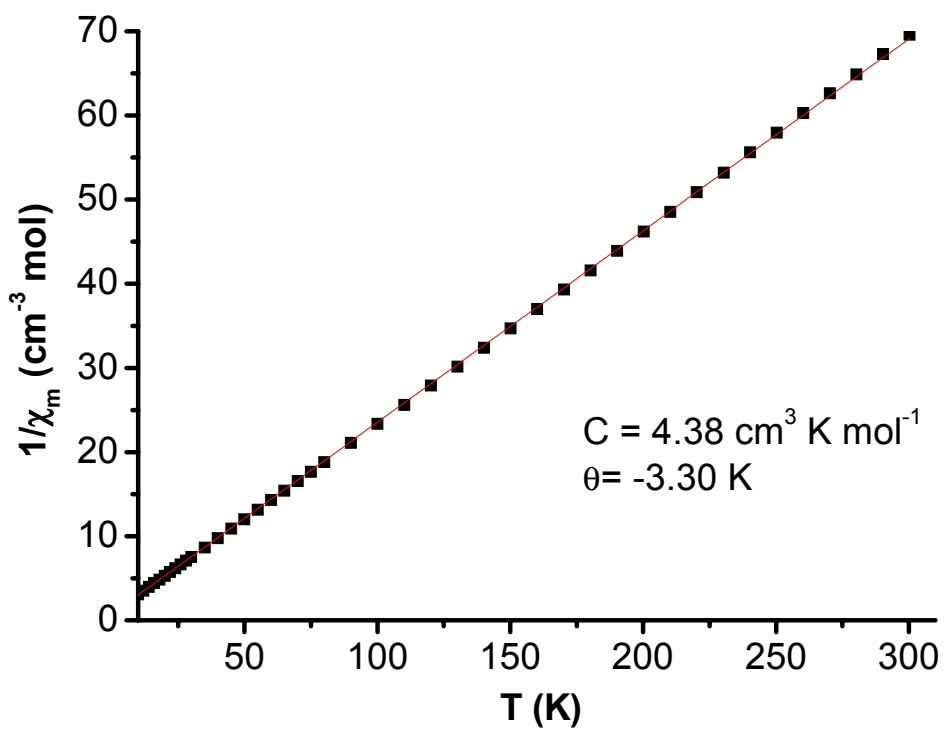

**Fig. S2** Inverse of the molar magnetic susceptibility of **1** vs temperature.
